# Supplementary material for: Epidemiological and microbiological characteristics of S. aureus pediatric infections in Colombia 2018–2021, a national multicenter study (Staphylored Colombia)
Source: PubMed Central journal article supplement (PMC11183781; doi:10.3389/fped.2024.1386310), 2024-06-04
Supplement: Image1.pdf [file Image1.pdf]

**Supplementary Figure 1. Antibiotic Resistance Frequency by City**

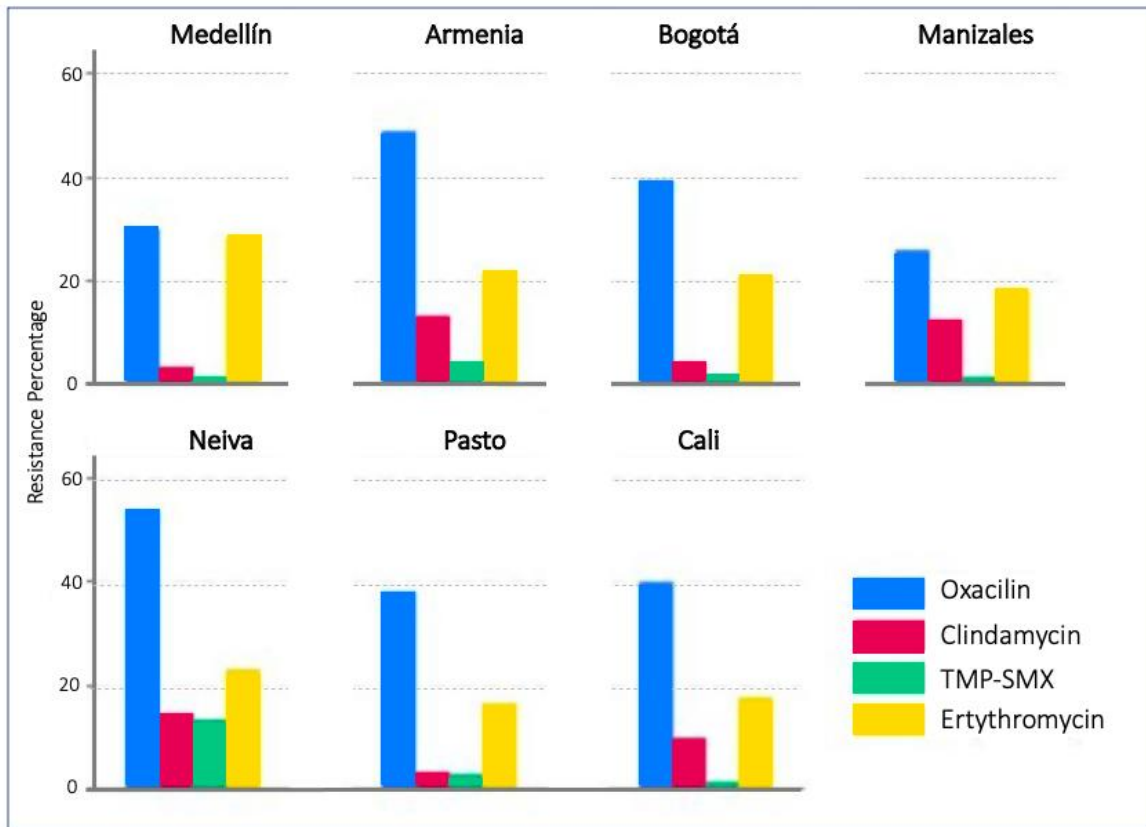

TMP-SMX: Trimethoprim-Sulfamethoxazole
